# Supplementary material
Source: PubMed Central journal article supplement (PMC5675555)
Supplement: NIHMS887145-supplement-1.pdf [file NIHMS887145-supplement-1.pdf]

## **Supplementary Text**

### **Principal Components Analysis (PCA):**

We performed PCA on each of the four different datasets along with European Americans (CEU), Han Chinese (CHB), and West Africans (YRI), and found that the Siddi in the Human Origins and Affymetrix 6.0 datasets are strong outliers as previously reported (Supplementary Figure 7)<sup>4,13,14</sup>. We next removed YRI, Siddi and indigenous Andamanese (another known outlier) from the datasets and repeated PCA (Figure 1b; Supplementary Figure 6). Similar to past studies, the PCA documents three broad groupings<sup>4,8,11</sup>. First, almost all South Asian groups speaking Indo-European and Dravidian languages lie along the “Indian Cline,” consistent with mixture from two highly divergent ancestral populations (Ancestral North Indian (ANI) ancestry related to Europeans, Central Asians, and Near Easterners, and Ancestral South Indian (ASI) ancestry that is as different from ANI as Europeans and East Asians are from each other)<sup>4</sup>. The second major cluster includes groups that speak Austroasiatic languages, as well as some non-Austroasiatic speaking groups that have similar ancestry possibly due to gene flow with Austroasiatic speaking neighbors or due to a history of language shift. This set of groups cluster together near the ASI end of the Indian cline, likely reflecting a large proportion of ASI-related ancestry as well as a distinct ancestry that is related to that in East Asians. Lastly, there are a set of groups with very different population histories that nonetheless all have genetic affinity to East Asian groups. These groups include the Austroasiatic speaking Khasi and Nicobarese, the Tibeto-Burman speaking groups, and several groups with evidence of East Asian mixture including Bengali. We confirmed the evidence of East Asian related mixture in some groups by observing significantly negative  $f_3(\text{Test}; \text{Mala, Chinese})$  statistics<sup>7</sup> (Supplementary Table 6).

### **Two Additional Methods to Measure the Strength of Founder Events:**

In addition to the IBD-based method for measuring the strength of founder events, we used two other methods that did not require phasing or IBD detection. First, we computed  $F_{ST}$  between each group and the closest cluster of groups with similar ancestry sources. Second, for groups on the Indian Cline we fit a model of population history using *qpGraph*<sup>7</sup> and measured the founder event as the group-specific drift after admixture (Supplementary Figure 5 and Supplementary Table 5). These two analyses measure genetic drift, which should be directly correlated with founder event strengths. We found that the results of both methods were highly correlated to that of the IBD-based method for all cases where a comparison was possible. The groups where this was possible consisted of all groups on the Indian cline for the *qpGraph* analyses and both groups on the Indian cline and groups with ancestry similar to Austroasiatic speakers for the  $F_{ST}$  analyses (Pearson correlation  $r=0.82-0.98$ ) (Supplementary Table 3).

### **Gene Mapping in Two Additional Sets of Patients:**

In addition to the 6 PPD patients with Cys78Tyr mutations mentioned in the main text, we genotyped 12 other patients, 6 with PPD and 6 with mucopolysaccharidosis

46 type IVA (MPS), a disease caused by mutations in the gene *GALNS*<sup>17</sup>. These 12  
47 patients were primarily from consanguineous marriages. We showed that while  
48 they could be mapped using genome-wide homozygosity mapping (Supplementary  
49 Figures 3b and 3d)<sup>18,19</sup>, they did not have substantial IBD across families at the  
50 disease mutation site. (If all PPD patients were mapped together, as would likely be  
51 the case if the mutations were not known beforehand, the mutation locus would still  
52 be found easily (Supplementary Figure 3c)). Moreover, the mutation site haplotypes  
53 were smaller than the PPD Cys78Tyr haplotypes (Supplementary Figures 4b and  
54 4d). This suggests that these 2 mutations are at high frequency due to older founder  
55 events than the one that occurred for the PPD Cys78Tyr mutations, which could  
56 explain why they were not discovered by IBD (which is most sensitive for young  
57 founder events within the last dozens of generations) and also why they are present  
58 primarily in individuals descending from consanguineous marriages (because they  
59 may be sufficiently rare that they do not come together at an appreciable rate except  
60 in the context of a consanguineous marriage). Taken together, this demonstrates the  
61 importance of the relatively young founder events found in this study (detectable by  
62 IBD), which likely lead to an increased burden for recessive diseases even in non-  
63 consanguineous contexts.

|                                        |          |          |          |          |          |           |
|----------------------------------------|----------|----------|----------|----------|----------|-----------|
| <b>Total Number of Individuals</b>     | <b>3</b> | <b>4</b> | <b>5</b> | <b>6</b> | <b>7</b> | <b>30</b> |
| <b>Times First Cousin Was Removed</b>  | 100      | 100      | 100      | 100      | 100      | 100       |
| <b>Times Second Cousin was Removed</b> | 100      | 100      | 100      | 100      | 100      | 100       |

64

65

66

67

68

69

70

**Supplementary Table 1. 100 simulations to determine sensitivity of relatedness filtering algorithm.** Results of performing the relatedness filtering algorithm with 100 simulations of both first and second cousins. The filtering algorithm was able to pick up and remove both the first and second cousin all 100 times in all different sample sizes (total number of individuals refers to the total including the first or second cousins).

71  
72  
73  
74  
75  
76

| IBD Thresholds | Number of Individuals | Times IBD Score of pop1 is greater than that of pop2 | Times IBD Score of pop1 is significantly greater than that of pop2 | Times IBD Score of pop3 is greater than that of pop2 | Times IBD Score of pop3 is significantly greater than that of pop2 | Times IBD Score of pop2 is significantly greater than that of pop3 |
|----------------|-----------------------|------------------------------------------------------|--------------------------------------------------------------------|------------------------------------------------------|--------------------------------------------------------------------|--------------------------------------------------------------------|
| 3-20cM         | 5                     | 100                                                  | 98                                                                 | 0                                                    | 0                                                                  | 5                                                                  |
| 3-20cM         | 4                     | 100                                                  | 79                                                                 | 0                                                    | 0                                                                  | 20                                                                 |
| 3-20cM         | 3                     | 98                                                   | 59                                                                 | 2                                                    | 0                                                                  | 42                                                                 |
| 3-20cM         | 2                     | 87                                                   | 18                                                                 | 11                                                   | 0                                                                  | 46                                                                 |
| >3 cM          | 5                     | 99                                                   | 95                                                                 | 1                                                    | 0                                                                  | 15                                                                 |
| >3 cM          | 4                     | 99                                                   | 73                                                                 | 3                                                    | 0                                                                  | 23                                                                 |
| >3 cM          | 3                     | 98                                                   | 42                                                                 | 4                                                    | 0                                                                  | 37                                                                 |
| >3 cM          | 2                     | 83                                                   | 10                                                                 | 10                                                   | 0                                                                  | 49                                                                 |

78

79 **Supplementary Table 2. 100 simulations to determine sensitivity and specificity of IBD analyses.** Results of  
80 performing IBD analyses with 100 simulations of groups of different bottleneck strengths (see Online Methods for details of  
81 the simulations and IBD score calculations). pop2=group with bottleneck approximately the strength of that of Finns based on  
82 having a similar IBD score; pop1=group with bottleneck twice as large as that of pop2; pop3=group with bottleneck half as  
83 large as that of pop2. This indicates that in groups with twice as strong of a bottleneck as Finns, the sensitivity of the IBD  
84 analyses is high with only 4-5 individuals, and in all cases, groups with bottlenecks half the strength of that of Finns never have  
85 a significantly higher IBD score than that of Finns. Based on this analysis, we aimed to genotype 5 individuals per group for the  
86 new genotyping reported in this study. The IBD thresholds show that adding the additional step of removing IBD segments  
87 above 20cM improved the sensitivity of the analyses. There is less sensitivity for determining whether a group has  
88 significantly smaller IBD score than that of Finns as shown by the last column.

| <b>Genotyping Platform</b> | <b>Comparison Group</b>                 | <b>Correlation (r)</b> |
|----------------------------|-----------------------------------------|------------------------|
| Human Origins              | IBD Score and $F_{ST}$ Score            | 0.815                  |
| Human Origins              | IBD Score and Group Specific Drift      | 0.860                  |
| Human Origins              | $F_{ST}$ Score and Group Specific Drift | 0.961                  |
| Affymetrix 6.0             | IBD Score and $F_{ST}$ Score            | 0.856                  |
| Affymetrix 6.0             | IBD Score and Group Specific Drift      | 0.913                  |
| Affymetrix 6.0             | $F_{ST}$ Score and Group Specific Drift | 0.965                  |
| Illumina                   | IBD Score and $F_{ST}$ Score            | 0.975                  |
| Illumina                   | IBD Score and Group Specific Drift      | 0.937                  |
| Illumina                   | $F_{ST}$ Score and Group Specific Drift | 0.960                  |
| Illumina_Omni              | IBD Score and $F_{ST}$ Score            | 0.953                  |
| Illumina_Omni              | IBD Score and Group Specific Drift      | 0.954                  |
| Illumina_Omni              | $F_{ST}$ Score and Group Specific Drift | 0.964                  |

90

91

92

93

94

95

96

97

98

**Supplementary Table 3. Measurements of founder event strength.** For each group on the Indian Cline, we computed three measures of founder event strength: IBD Score,  $F_{ST}$  score, and model-based group-specific drift using *qpGraph* (Online Methods). The three measurements are highly correlated for all cases where a comparison was possible, meaning groups on the Indian cline for the *qpGraph* analyses and both groups on the Indian cline and groups with ancestry similar to Austroasiatic speakers for the  $F_{ST}$  analyses.

| Location              | Linguistic Affiliation | Group                      | Groups with High Shared IBD                                                                                 |
|-----------------------|------------------------|----------------------------|-------------------------------------------------------------------------------------------------------------|
| Gujarat               | IndoEuropean           | Muslim_Jat                 | Balochi, Muslim_Jat                                                                                         |
| Pakistan              | IndoEuropean           | Balochi                    | Balochi, Brahui, Makrani, Muslim_Jat                                                                        |
| Pakistan              | Dravidian              | Brahui                     | Balochi, Brahui, Makrani                                                                                    |
| Pakistan              | IndoEuropean           | Makrani                    | Balochi, Brahui, Makrani                                                                                    |
| Chhattisgarh          | IndoEuropean           | Ghasia                     | Satnami                                                                                                     |
| Chhattisgarh          | IndoEuropean           | Satnami                    | Gamit, Ghasia, Satnami                                                                                      |
| Gujarat               | IndoEuropean           | Gamit                      | Gamit, Satnami                                                                                              |
| Maharashtra           | IndoEuropean           | Warli                      | Kathodi, Warli                                                                                              |
| Gujarat               | IndoEuropean           | Kathodi                    | Kathodi, Kolcha, Kotwalia, Warli                                                                            |
| Gujarat               | IndoEuropean           | Kolcha                     | Kathodi, Kolcha, Kotwalia                                                                                   |
| Gujarat               | IndoEuropean           | Kotwalia                   | Kathodi, Kolcha, Kotwalia                                                                                   |
| Gujarat               | IndoEuropean           | Patel                      | Baniya, GujaratID, Patel                                                                                    |
| Haryana               | IndoEuropean           | Baniya                     | GujaratID, Jain, Patel                                                                                      |
| US                    | IndoEuropean           | GujaratID                  | Baniya, Patel                                                                                               |
| Punjab                | IndoEuropean           | Sikh_Jatt                  | Punjabi, Scheduled Caste_Haryana                                                                            |
| Punjab                | IndoEuropean           | Punjabi                    | Scheduled Caste_Haryana, Sikh_Jatt                                                                          |
| Haryana               | IndoEuropean           | Scheduled Caste_Haryana    | Punjabi, Scheduled Caste_Haryana, Scheduled Caste_Uttarakhand, Sikh_Jatt                                    |
| Uttar Pradesh         | IndoEuropean           | Pal                        | Pal, Tharu_Uttarakhand                                                                                      |
| Uttarakhand           | IndoEuropean           | Tharu_Uttarakhand          | Pal                                                                                                         |
| Uttarakhand           | IndoEuropean           | Syon                       | Syon,Wan                                                                                                    |
| Uttarakhand           | IndoEuropean           | Wan                        | Syon,Wan                                                                                                    |
| Goa                   | IndoEuropean           | Brahmin_Catholic_Goa       | Brahmin_Catholic_Goa, Brahmin_Catholic_Kumta, Brahmin_Catholic_Mangalore                                    |
| Karnataka (Kumta)     | IndoEuropean           | Brahmin_Catholic_Kumta     | Brahmin_Catholic_Goa, Brahmin_Catholic_Kumta, Brahmin_Catholic_Mangalore                                    |
| Karnataka (Mangalore) | IndoEuropean           | Brahmin_Catholic_Mangalore | Brahmin_Catholic_Goa, Brahmin_Catholic_Kumta, Brahmin_Catholic_Mangalore                                    |
| Uttarakhand           | IndoEuropean           | Brahmin_Uttarakhand        | Brahmin_Nepal, Brahmin_Uttarakhand                                                                          |
| Nepal                 | IndoEuropean           | Brahmin_Nepal              | Brahmin_Nepal, Brahmin_Uttarakhand                                                                          |
| Nagaland              | TibetoBurman           | Chakehshanega              | Chakehshanega, Nagaseema, Poumainaga                                                                        |
| Nagaland              | TibetoBurman           | Nagaseema                  | Chakehshanega, Nagaseema, Poumainaga                                                                        |
| Manipur               | TibetoBurman           | Poumainaga                 | Chakehshanega, Nagaseema, Poumainaga                                                                        |
| Karnataka             | Dravidian              | Hakki_Pikki                | Hakki_Pikki, Malaikuravar, Narikuravar                                                                      |
| Tamil Nadu            | Dravidian              | Malaikuravar               | Hakki_Pikki, Malaikuravar, Narikuravar                                                                      |
| Tamil Nadu            | Dravidian              | Narikuravar                | Hakki_Pikki, Malaikuravar, Narikuravar                                                                      |
| Tamil Nadu            | Dravidian              | Indumalayali               | Indumalayali, Irula                                                                                         |
| Tamil Nadu            | Dravidian              | Irula                      | Indumalayali, Irula                                                                                         |
| Tamil Nadu            | Dravidian              | Palliyar                   | Palliyar, Pulliyar                                                                                          |
| Tamil Nadu            | Dravidian              | Pulliyar                   | Palliyar, Pulliyar                                                                                          |
| Andhra Pradesh        | Dravidian              | Oddari                     | Korava, Oddari                                                                                              |
| Andhra Pradesh        | Dravidian              | Vadde                      | Korava, Vadde                                                                                               |
| Karnataka             | Dravidian              | Korava                     | Korava, Oddari, Vadde, Yerukali                                                                             |
| Andhra Pradesh        | Dravidian              | Yerukali                   | Korava, Yerukali                                                                                            |
| Tamil Nadu            | Dravidian              | Gugavellalar               | Gugavellalar, Madiga                                                                                        |
| Andhra Pradesh        | Dravidian              | Yanidi                     | Hindumalayali, Yanidi                                                                                       |
| Tamil Nadu            | Dravidian              | Hindumalayali              | Hindumalayali, Yanidi                                                                                       |
| Andhra Pradesh        | Dravidian              | Madiga                     | Gugavellalar                                                                                                |
| Andhra Pradesh        | Dravidian              | Budagajangam               | Budagajangam, Vysya                                                                                         |
| Andhra Pradesh        | Dravidian              | Vysya                      | Budagajangam, Vysya                                                                                         |
| Andhra Pradesh        | Dravidian              | Bestha                     | Bestha, Pattapu_Kapu                                                                                        |
| Andhra Pradesh        | Dravidian              | Pattapu_Kapu               | Bestha, Pattapu_Kapu                                                                                        |
| Andhra Pradesh        | Dravidian              | Irula                      | Irula, Malayan                                                                                              |
| Kerala                | Dravidian              | Malayan                    | Irula                                                                                                       |
| Karnataka             | Dravidian              | Brahmin_Karnataka          | Brahmin_Karnataka, Havik                                                                                    |
| Karnataka             | Dravidian              | Havik                      | Brahmin_Karnataka, Havik                                                                                    |
| Orissa                | AustroAsiatic          | Mohali                     | Bhumij_Jharkhand, Gorait, Lohra, Manjhi_Jharkhand, Mohali, Mohli, Panika_MP, Panika_Jharkhand               |
| Orissa                | AustroAsiatic          | Bhumij_Orissa              | Bhumij_Jharkhand, Bhumij_Orissa, Hojo, Ho_Orissa, Lohra, Manjhi_Jharkhand, Munda, Santhal                   |
| Orissa                | AustroAsiatic          | Ho_Orissa                  | Bhumij_Jharkhand, Bhumij_Orissa, Birhor, Hojo, Ho_Orissa, Kharia, Lohra, Munda, Santhal                     |
| Chhattisgarh          | IndoEuropean           | Khairwar                   | Asur, Birhor, Ho_Orissa, Khairwar, Manjhi_Jharkhand, Munda, Santhal                                         |
| Jharkhand             | AustroAsiatic          | Hojo                       | Bhumij_Jharkhand, Bhumij_Orissa, Hojo, Ho_Orissa, Lohra, Manjhi_Jharkhand, Munda, Santhal                   |
| Jharkhand             | AustroAsiatic          | Asur                       | Asur, Bhumij_Orissa, Ho_Orissa, Khairwar                                                                    |
| Jharkhand             | AustroAsiatic          | Bhumij_Jharkhand           | Barela, Bhumij_Jharkhand, Bhumij_Orissa, Birhor, Hojo, Ho_Orissa, Mohali, Munda, Santhal                    |
| Jharkhand             | AustroAsiatic          | Santhal                    | Bhumij_Jharkhand, Bhumij_Orissa, Birhor, Hojo, Ho_Orissa, Khairwar, Lohra, Manjhi_Jharkhand, Munda, Santhal |
| Jharkhand             | AustroAsiatic          | Munda                      | Bhumij_Jharkhand, Bhumij_Orissa, Hojo, Ho_Orissa, Santhal                                                   |
| Jharkhand             | AustroAsiatic          | Birhor                     | Bhumij_Jharkhand, Birhor, Ho_Orissa, Khairwar, Manjhi_Jharkhand, Santhal                                    |
| Jharkhand             | AustroAsiatic          | Gorait                     | Gorait, Lohra, Mohali, Mohli, Oraon                                                                         |
| Jharkhand             | IndoEuropean           | Panika_MP                  | Chauhan, Mohali, Mohli, Panika_MP, Panika_Jharkhand                                                         |
| Madhya Pradesh        | IndoEuropean           | Panika_Jharkhand           | Mohali, Panika_MP, Panika_Jharkhand                                                                         |
| Madhya Pradesh        | AustroAsiatic          | Korku                      | Mawasi                                                                                                      |
| Madhya Pradesh        | AustroAsiatic          | Mawasi                     | Korku, Mawasi                                                                                               |
| Madhya Pradesh        | IndoEuropean           | Baiga                      | Baiga, Bharia                                                                                               |
| Madhya Pradesh        | Dravidian              | Bharia                     | Baiga, Bharia                                                                                               |
| Madhya Pradesh        | IndoEuropean           | Barela                     | Barela, Bhilala, Bhumij_Jharkhand, Bink                                                                     |
| Madhya Pradesh        | IndoEuropean           | Bhilala                    | Barela, Bhilala                                                                                             |
| Chhattisgarh          | IndoEuropean           | Chauhan                    | Chauhan, Lohra, Mohli, Panika_MP                                                                            |
| Jharkhand             | IndoEuropean           | Tanti                      | Lohra, Mohli                                                                                                |
| Jharkhand             | IndoEuropean           | Mohli                      | Chauhan, Gorait, Lohra, Manjhi_Jharkhand, Mohali, Mohli, Oraon, Panika_MP, Tanti                            |
| Jharkhand             | IndoEuropean           | Lohra                      | Chauhan, Gorait, Manjhi_Jharkhand, Mohli, Santhal, Tanti                                                    |
| Jharkhand             | IndoEuropean           | Manjhi_Jharkhand           | Bhumij_Orissa, Birhor, Hojo, Lohra, Manjhi_Jharkhand, Mohali, Mohli, Santhal                                |
| Jharkhand             | IndoEuropean           | Oraon                      | Gorait, Mohli, Oraon                                                                                        |

99  
100  
101  
102

**Supplementary Table 4. IBD sharing across groups.** Groups with more than one match for high shared IBD across groups (greater than 3 times the IBD score of CEU and ~1/3 the founder event strength of Ashkenazi Jews).

| Source1 | Source2 | Target                     | $f_3$   | Std. Err. | Z       | SNPs  | # Samples in Target |
|---------|---------|----------------------------|---------|-----------|---------|-------|---------------------|
| Mala    | CHB     | Tharu_Uttrakhand           | -0.0135 | 0.0006    | -21.1   | 92226 | 4                   |
| Mala    | CHB     | Tharu_UP                   | -0.0122 | 0.0007    | -16.398 | 92159 | 3                   |
| Mala    | CHB     | Magar                      | -0.0097 | 0.0003    | -36.818 | 81501 | 27                  |
| Mala    | CHB     | Newar                      | -0.0095 | 0.0005    | -20.044 | 91534 | 6                   |
| Mala    | CHB     | Wan                        | -0.0089 | 0.0009    | -10.359 | 92824 | 3                   |
| Mala    | CHB     | Syon                       | -0.0086 | 0.0008    | -10.645 | 92535 | 3                   |
| Mala    | CHB     | Thakur                     | -0.0079 | 0.0004    | -21.64  | 88899 | 10                  |
| Mala    | CHB     | Rajbanshi                  | -0.0067 | 0.0003    | -20.85  | 89025 | 17                  |
| Mala    | CHB     | Sherpa                     | -0.0057 | 0.0009    | -6.425  | 93939 | 3                   |
| Mala    | CHB     | Hazara                     | -0.0057 | 0.0004    | -16.087 | 87624 | 14                  |
| Mala    | CHB     | Shah                       | -0.0049 | 0.0007    | -7.021  | 92042 | 4                   |
| Mala    | CHB     | BEB (Bengali)              | -0.0046 | 0.0002    | -21.636 | 79064 | 86                  |
| Mala    | CHB     | Bink                       | -0.0040 | 0.0008    | -4.906  | 91702 | 3                   |
| Mala    | CHB     | Chamar_UP                  | -0.0027 | 0.0013    | -2.152  | 92603 | 2                   |
| Mala    | CHB     | Scheduled_Caste_Uttrakhand | -0.0024 | 0.0007    | -3.542  | 92008 | 4                   |
| Mala    | CHB     | Minero                     | 0.0028  | 0.0004    | 7.684   | 87579 | 18                  |
| Mala    | CHB     | Brahmin_Uttrakhand         | 0.0045  | 0.0006    | 7.462   | 89908 | 6                   |
| Mala    | CHB     | Burusho                    | 0.0107  | 0.0004    | 25.374  | 84324 | 23                  |
| Mala    | CHB     | Kusunda                    | 0.0127  | 0.0006    | 21.111  | 92036 | 10                  |
| Mala    | CHB     | Nyshi                      | 0.0130  | 0.0008    | 16.768  | 91472 | 5                   |
| Mala    | CHB     | Nagaseema                  | 0.0130  | 0.0011    | 11.796  | 91060 | 3                   |

103

104

105

106

107

108

**Supplementary Table 6. Groups with significant evidence of East Asian related admixture.** Table of statistics of the form  $f_3(\text{Target}; \text{Mala, CHB})$ . Negative statistics indicate that the target group descends from an admixture of Mala (proxy for ANI and ASI ancestry), and CHB (proxy for East Asian-like ancestry). Standard errors are based on a weighted Block Jackknife (see Online Methods).

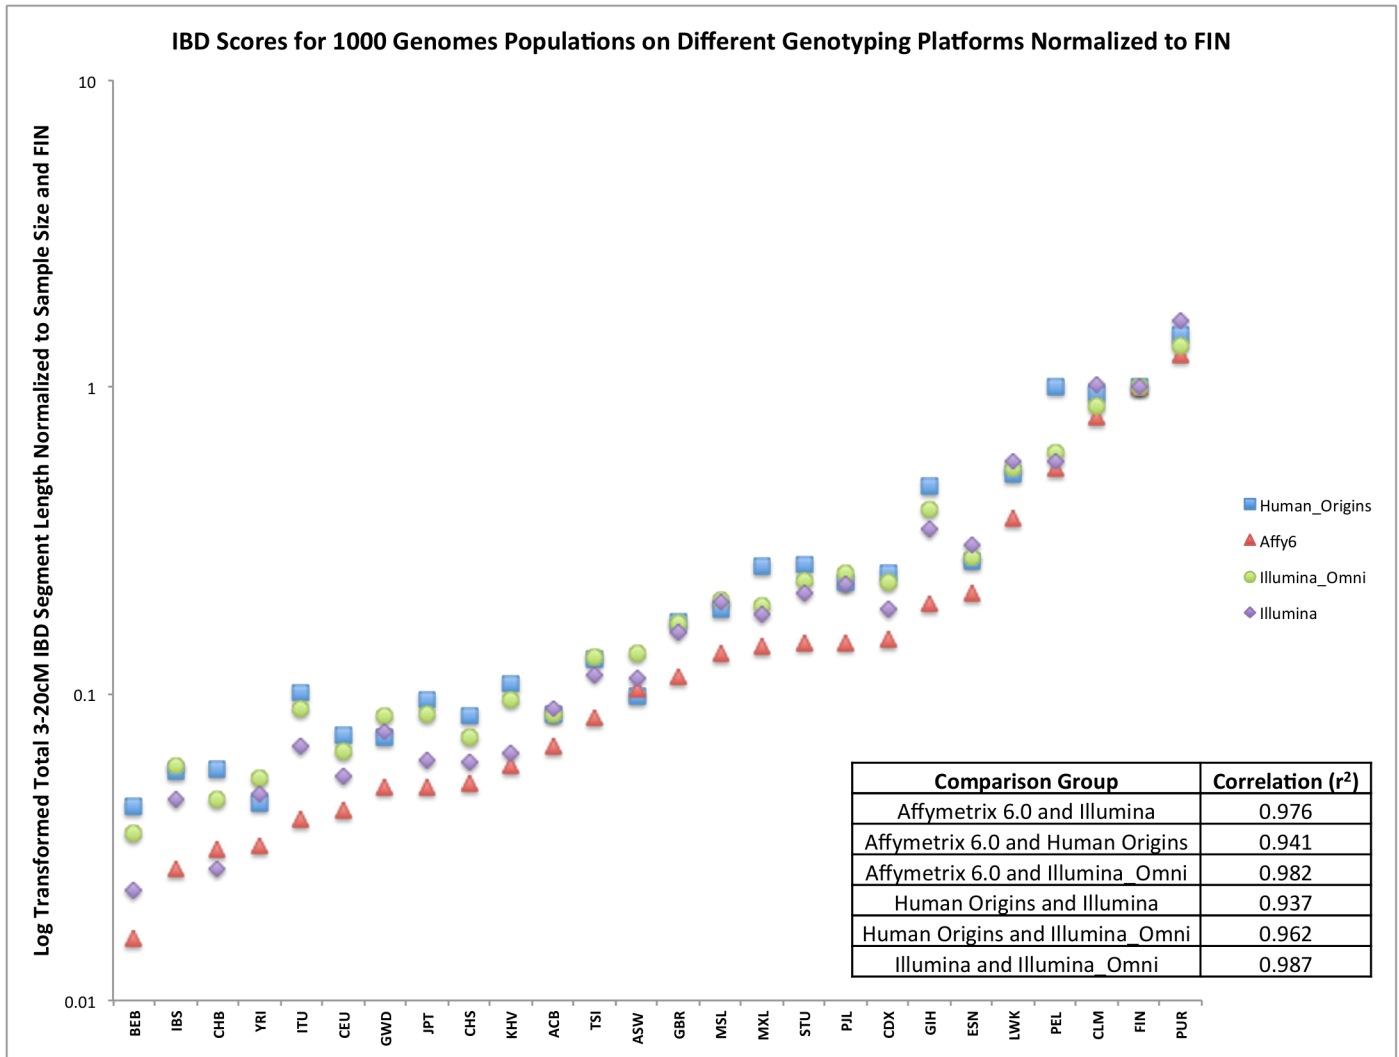

109  
110  
111

**Supplementary Figure 1. Platform differences in IBD score.** IBD Scores for 1000 Genomes groups in all 4 genotyping platforms after normalizing to FIN in each dataset.



## IBD Scores of Simulated Populations

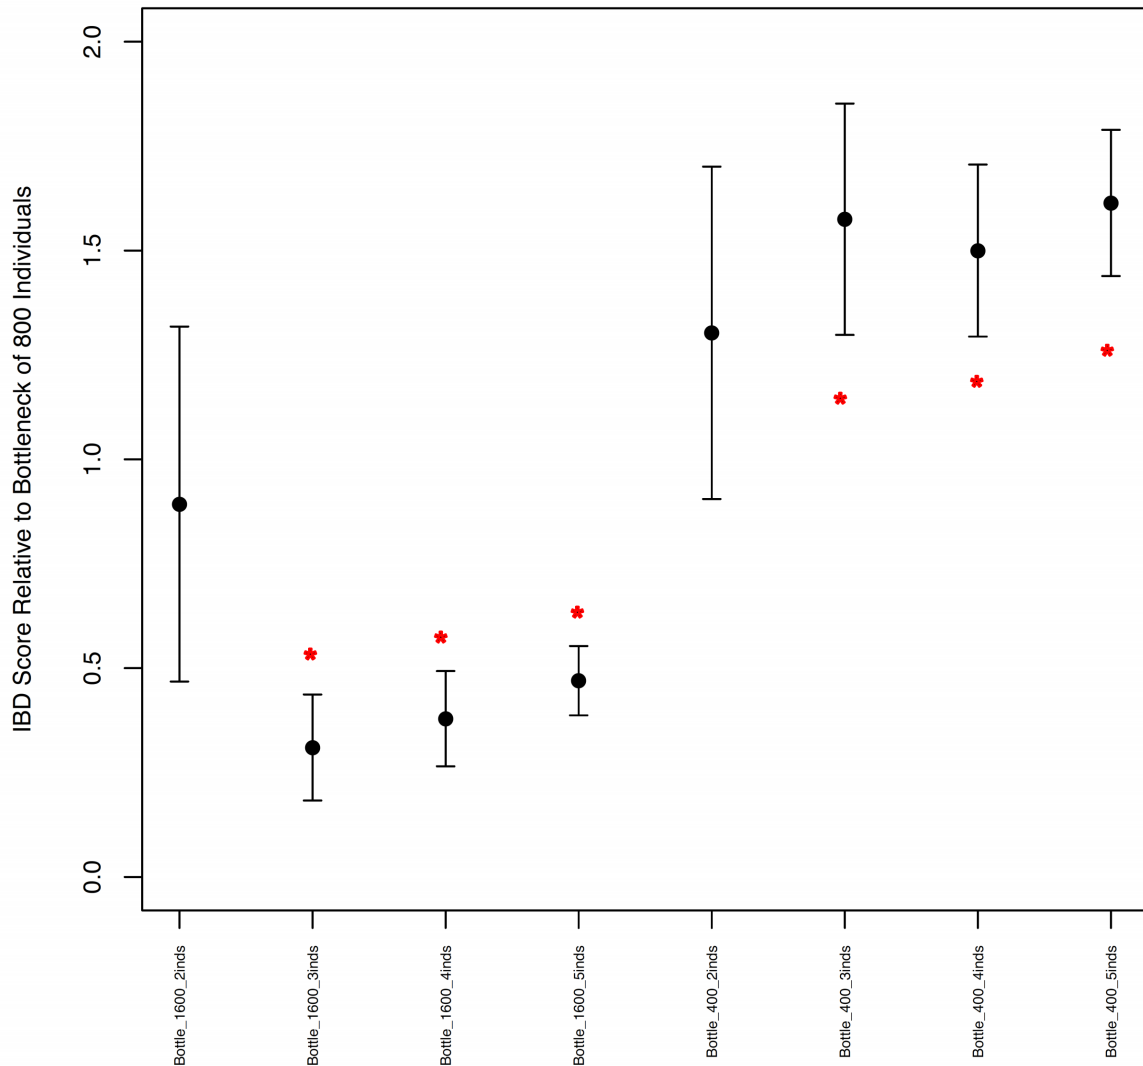

112

113

114 **Supplementary Figure 2. Example simulation to determine number of samples**

115 **needed to detect accurately a strong founder event.** Scatterplot of IBD scores of

116 simulated groups with bottlenecks twice as strong (400 individuals) or half as

117 strong (1600 individuals) as a group with a bottleneck of strength similar to that of

118 Finns (800 individuals). The points are the IBD scores of the different groups

119 relative to those of the group with Finnish bottleneck strength. Error bars are

120 standard errors. Red stars indicate significance defined as having a 95% confidence

121 interval ( $\pm 1.96 * s.e.$ ) that does not overlap with 1. Supplementary Table 2 shows the

122 results for all 100 simulations.

123

A)

IBD and Homozygosity in PPD Patients with Cys78Tyr Mutation

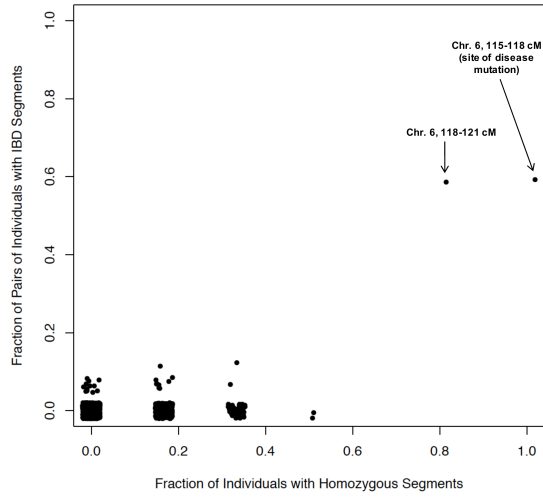

B)

IBD and Homozygosity in PPD Patients with Cys337Tyr Mutation

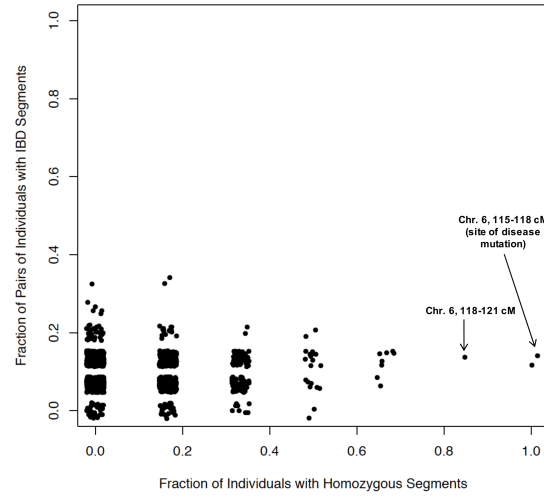

C)

IBD and Homozygosity in all PPD Patients

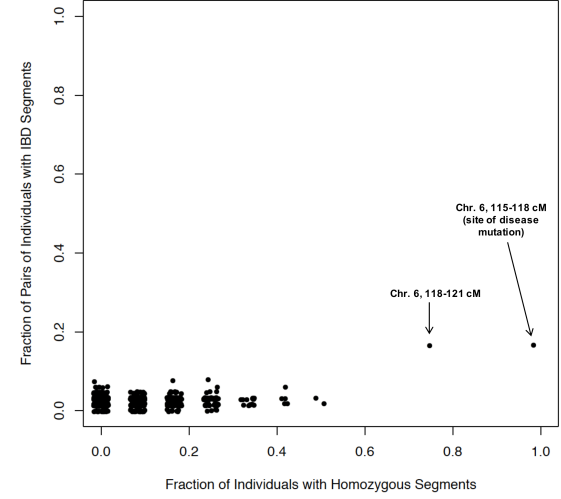

124  
125

126 D)

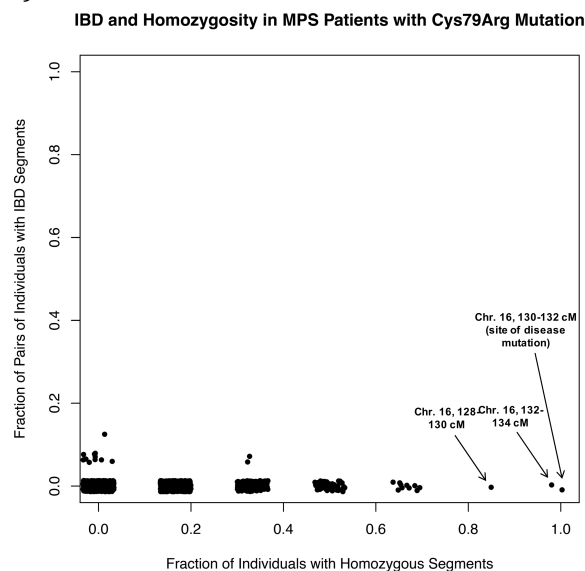

127  
128  
129  
130  
131  
132  
133  
134  
135

**Supplementary Figure 3. Genomic differences between different progressive pseudorheumatoid dysplasia (PPD) and mucopolysaccharidosis (MPS) type IVA mutations.** Scatterplots of percentage of individuals with homozygous segments vs. percentage of pairs of individuals with IBD segments (using our conservative thresholds for declaring IBD) for all 3 cM regions in the genome in (A) patients with Cys78Tyr mutations, (B) patients with Cys337Tyr mutations, (C) all PPD patients combined (those with Cys78Tyr and Cys337Tyr mutations), and (D) MPS patients with Cys79Arg mutations (for these patients we used 2 cM segments). Random jitter was added to the points for clarity. Segments that fell into 2 or more regions were included in both.

136 A)

Haplotype Sharing in PPD Patients with Cys78Tyr Mutations

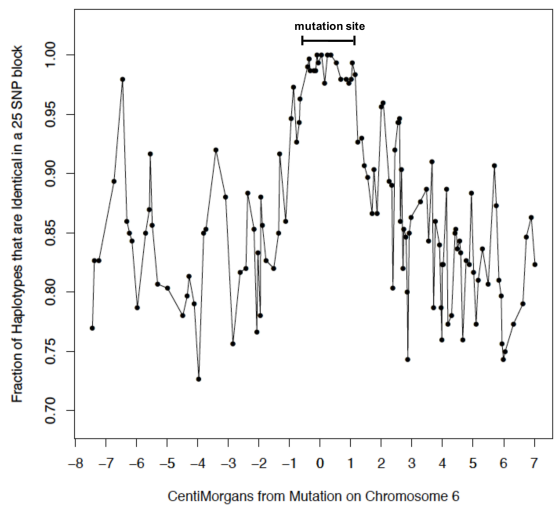

B)

Haplotype Sharing in PPD Patients with Cys337Tyr Mutations

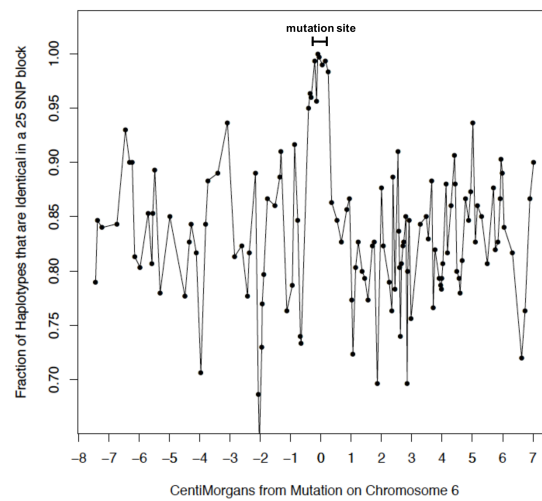

C)

Haplotype Sharing in Mala Individuals Without Disease

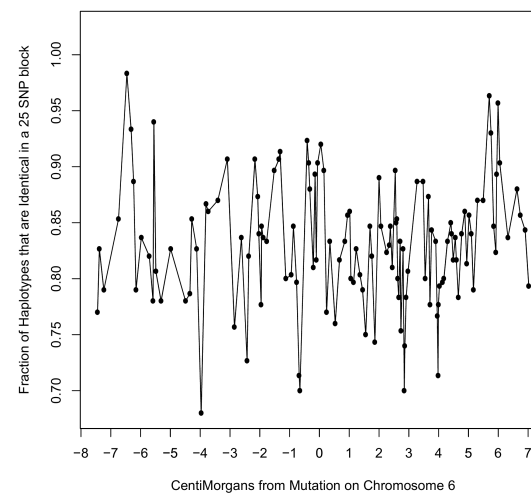

- 137
- 138
- 139
- 140
- 141
- 142
- 143
- 144
- 145
- 146
- 147
- 148
- 149
- 150
- 151

152 D)

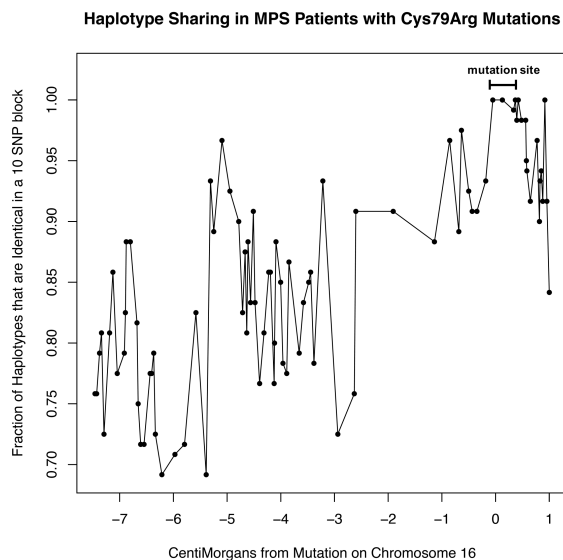

E)

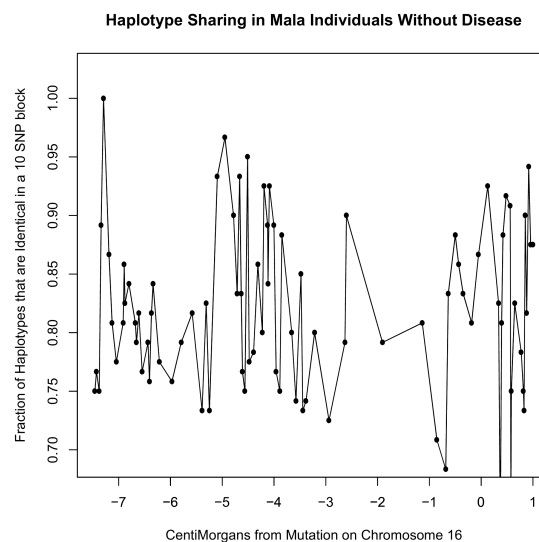

153

154 **Supplementary Figure 4. Haplotype sharing profiles of progressive pseudorheumatoid dysplasia (PPD) and**  
155 **mucopolysaccharidosis (MPS) type IVA patients.** The fraction of haplotypes in 25 SNP blocks that are identical is plotted in  
156 the region surrounding the relevant mutation site on Chromosome 6 for MPS patients with A) Cys78Tyr mutations and B)  
157 Cys337Tyr mutations, as well as C) in the same region for Mala individuals without disease as a negative control. For MPS  
158 patients the mutation is near the end of the chromosome where SNP coverage is lower. Thus, the fraction of haplotypes in 10  
159 SNP blocks that are identical is plotted in the region surrounding the relevant mutation site on Chromosome 16 for MPS  
160 patients with D) Cys79Arg mutations as well as E) in the same region for Mala individuals without disease.

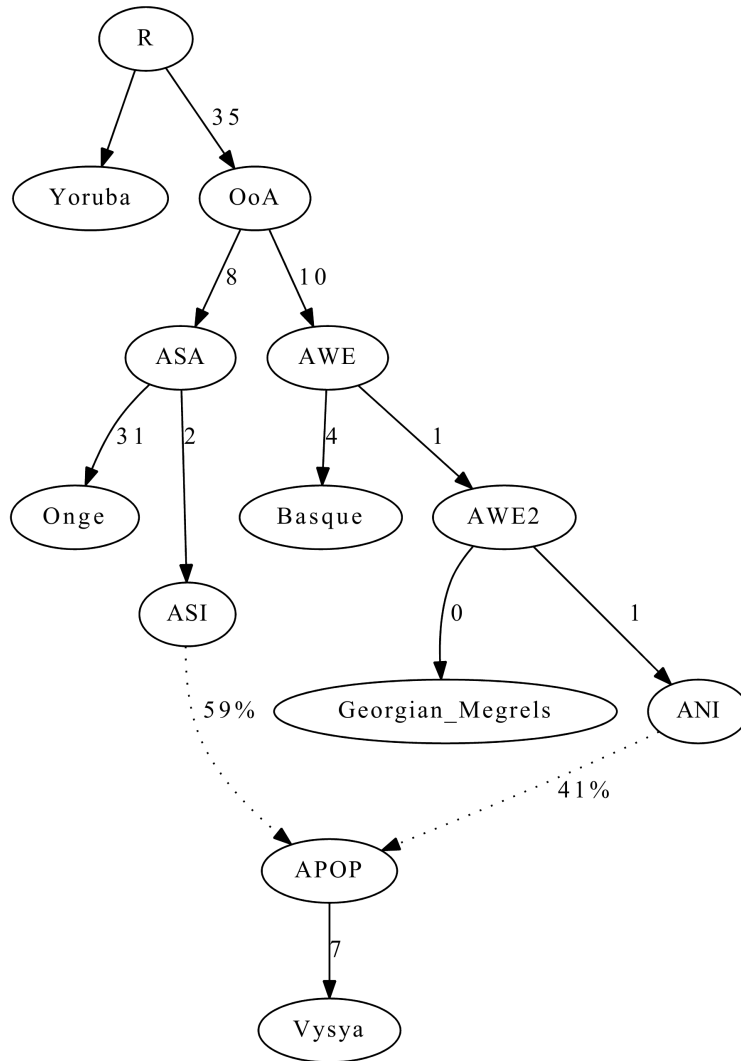

161  
162  
163  
164  
165  
166

**Supplementary Figure 5.** Model used for estimating group specific drift in Indian groups (Vysya is an example Indian group). R=root; OoA=out of Africa; ASA=ancestral South Asian; ASI=ancestral Southern Indian; AWE=ancestral West Eurasian; ANI=ancestral North Indian; APOP=ancestral Indian group. Branch lengths are shown in units of  $F_{ST} \times 1,000$ .

167

A)

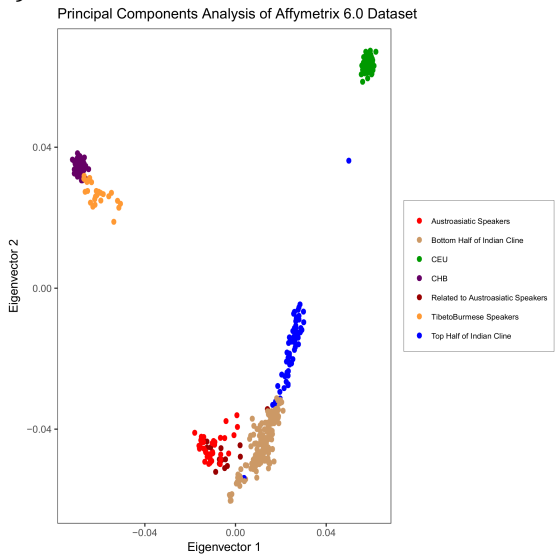

B)

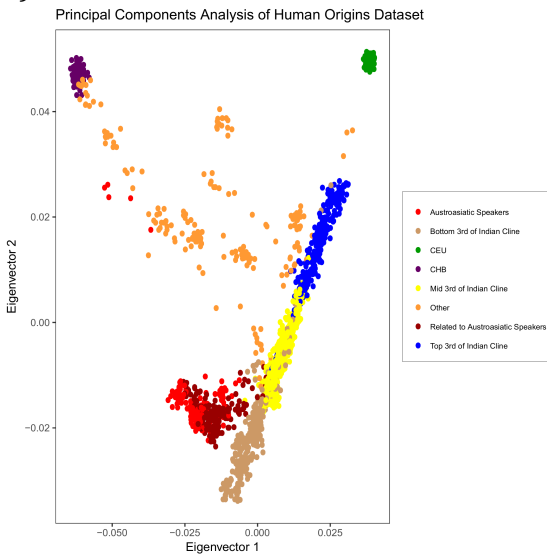

168

169

C)

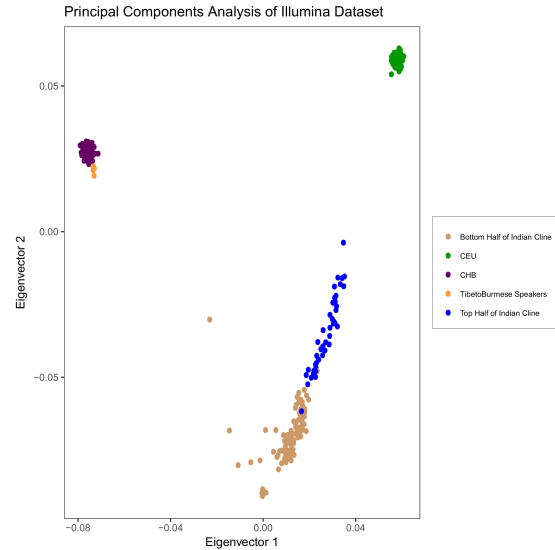

D)

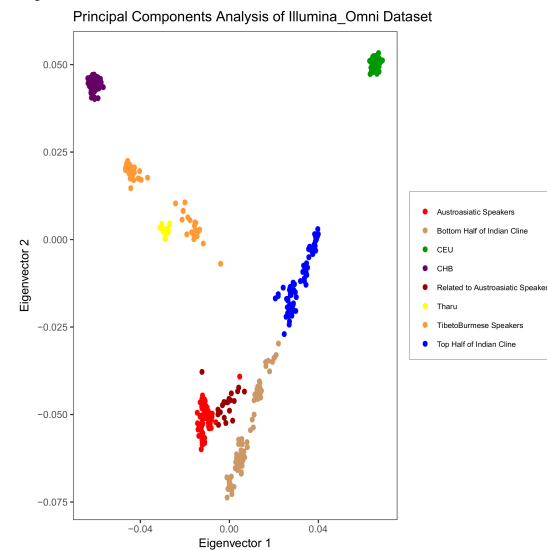

170

171

172

173

174

175

176

177

178

179

**Supplementary Figure 6. Principal Components Analyses subdivided into clusters for  $F_{ST}$  analyses.** (A) Affymetrix 6.0, (B) Human Origins, (C) Illumina, and (D) Illumina\_Omni datasets. These plots are used to separate the groups into different clusters for  $F_{ST}$  analyses with the different sections of the Indian cline (e.g. “Top Half of Indian Cline” or “Bottom 3rd of Indian Cline”) or Austroasiatic related (combined) each representing one cluster. (These analyses are described more fully in Online Methods section). ‘Other’ refers to ancestry outliers and groups with East Asian affinities.

180

A)

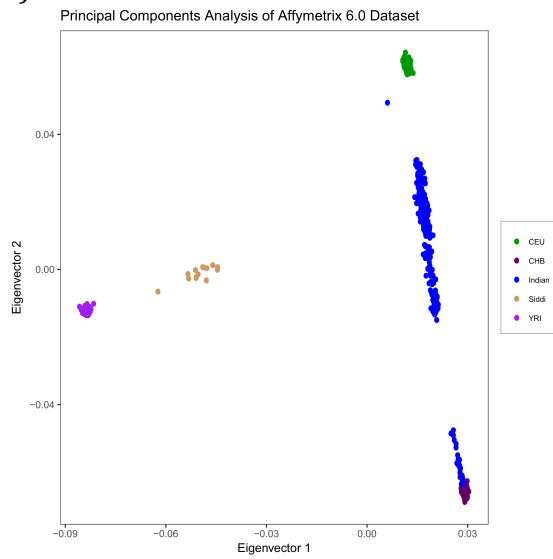

B)

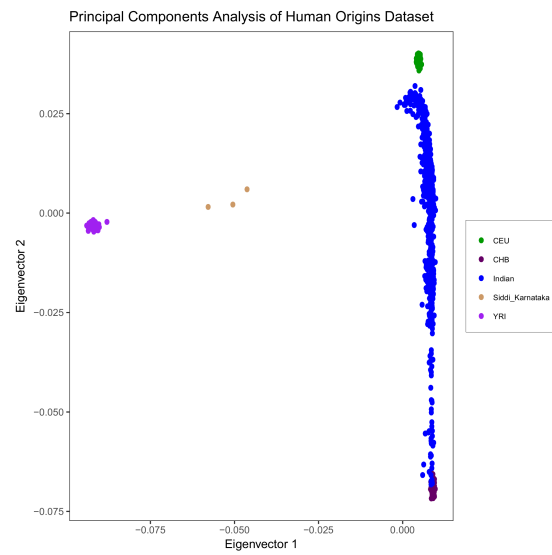

181  
182  
183  
184  
186

**Supplementary Figure 7.** Principal Components Analysis of A) Affymetrix 6.0 and B) Human Origins data along with CEU (European Americans), CHB (Han Chinese), and YRI (West Africans).
